# Supplementary material for: Loss of H3K27 methylation identifies poor outcomes in adult-onset acute leukemia
Source: PubMed Central journal article supplement (PMC7841917; doi:10.1186/s13148-021-01011-x), 2021-01-28

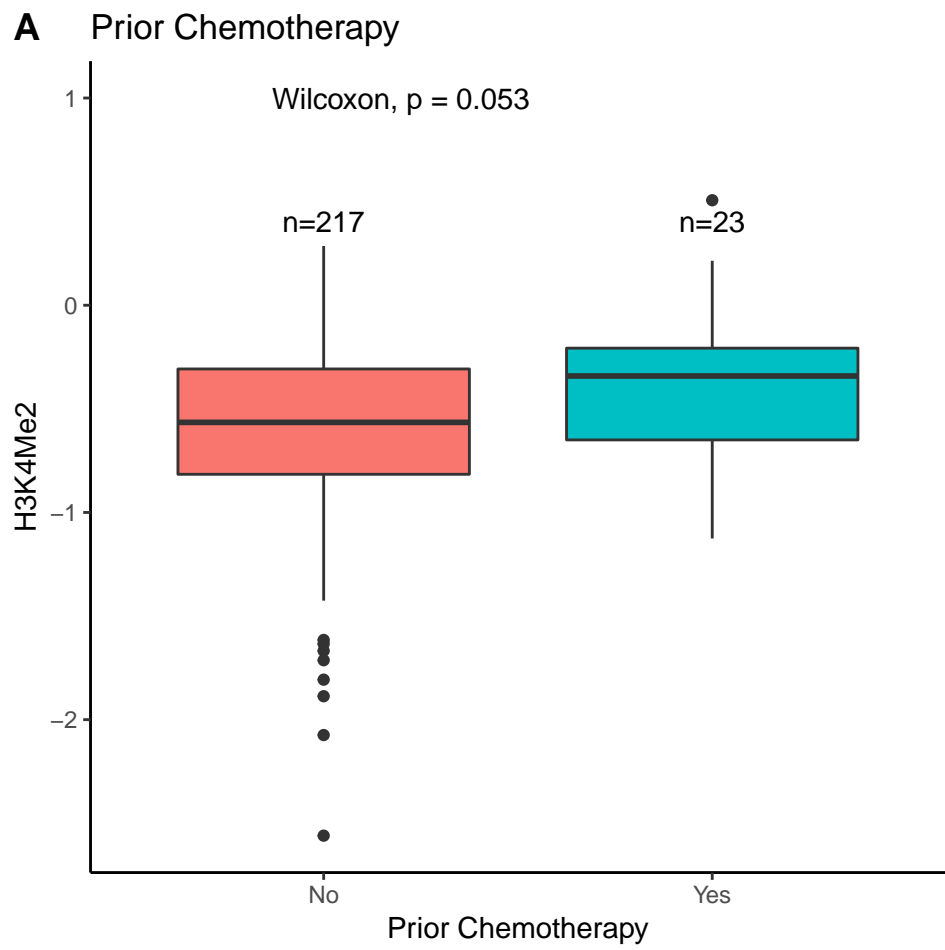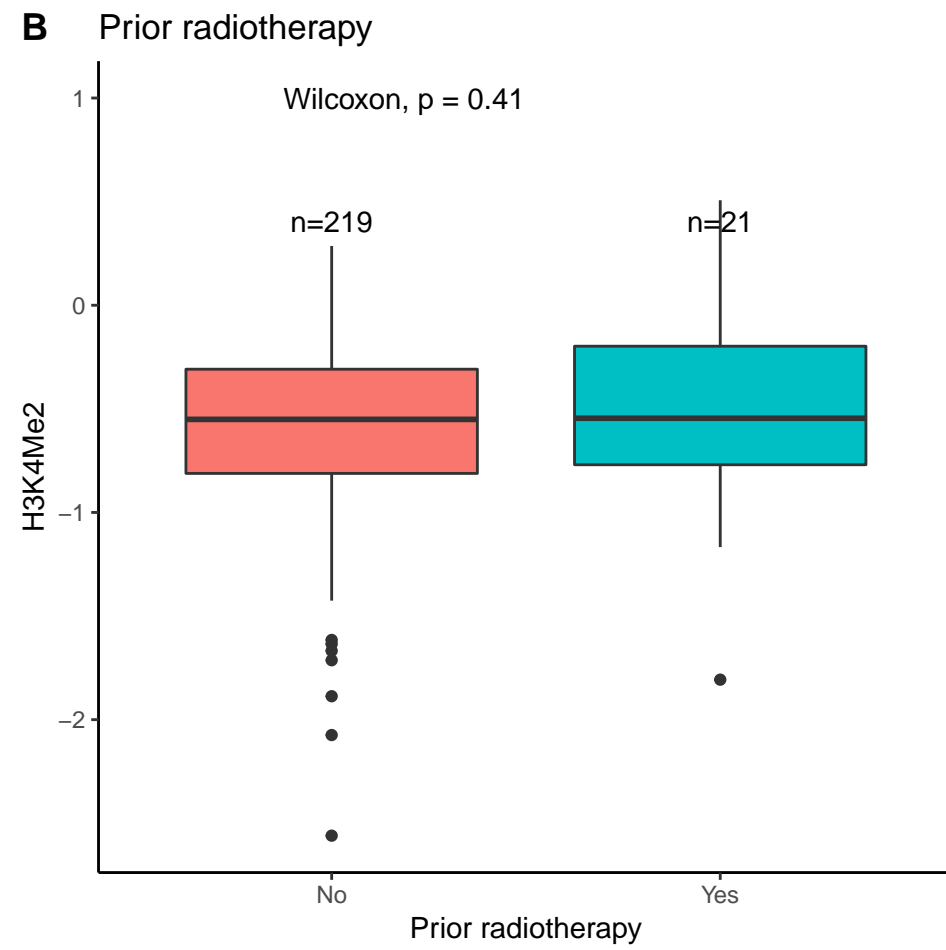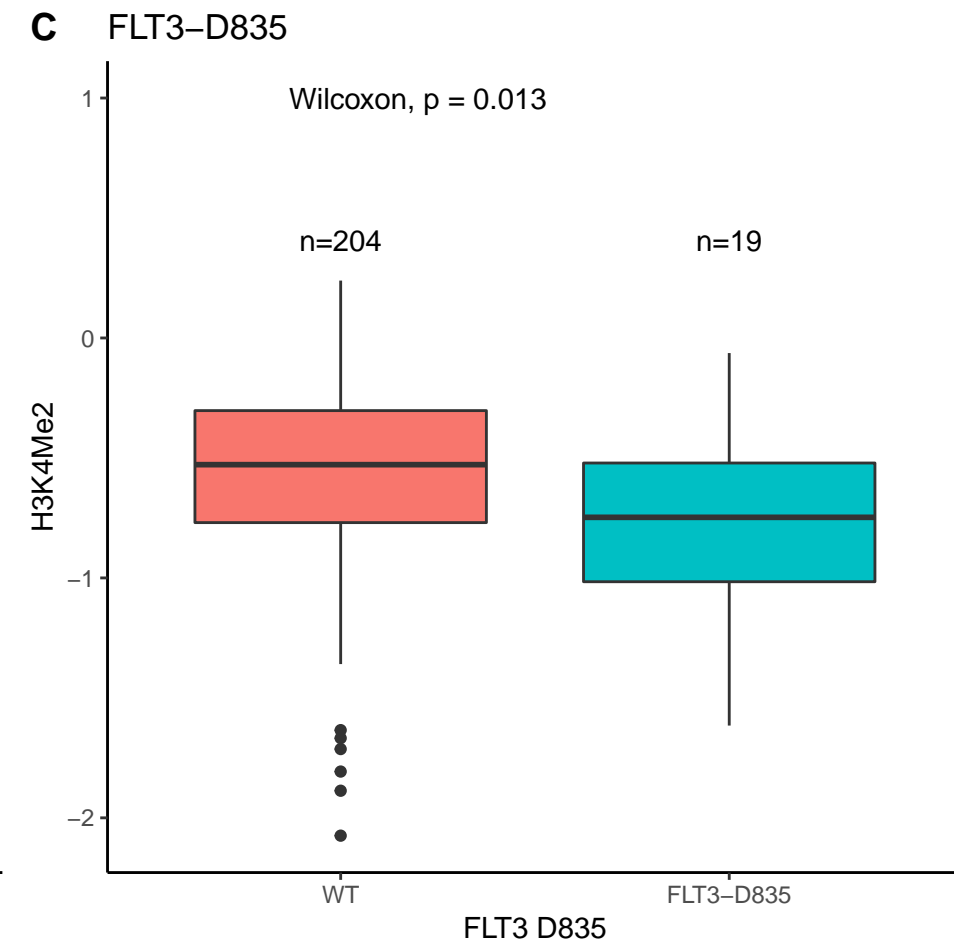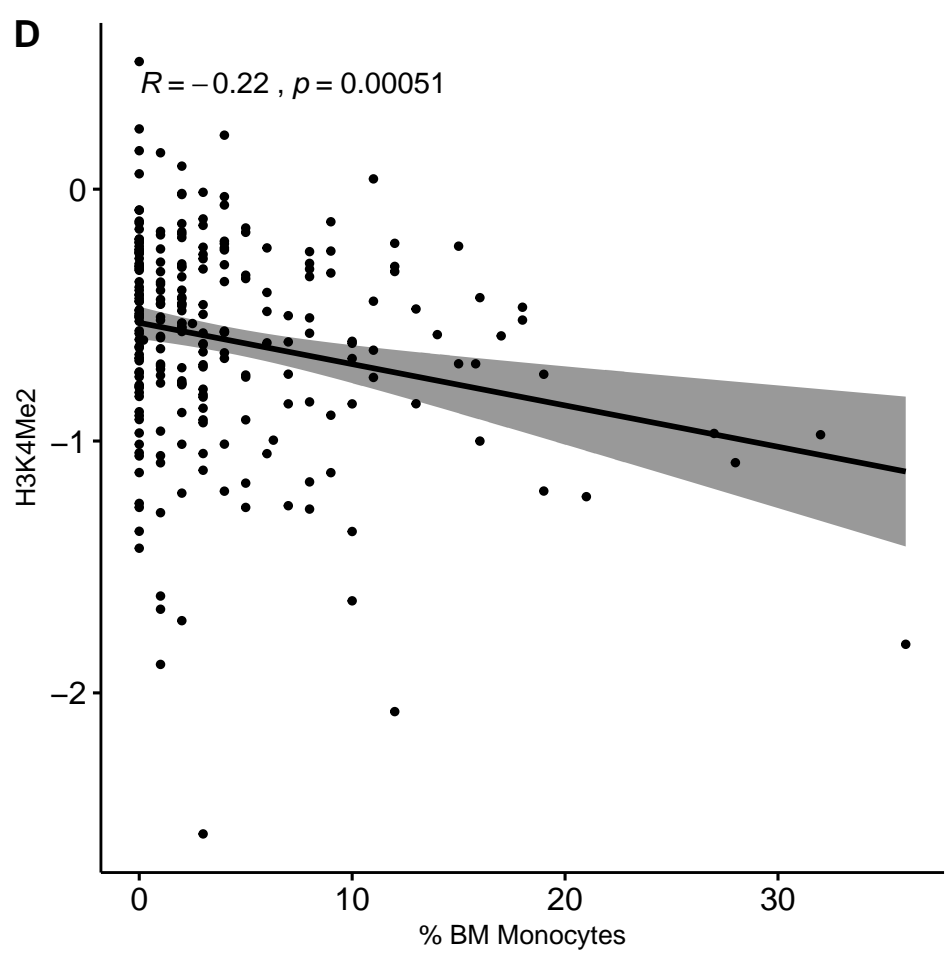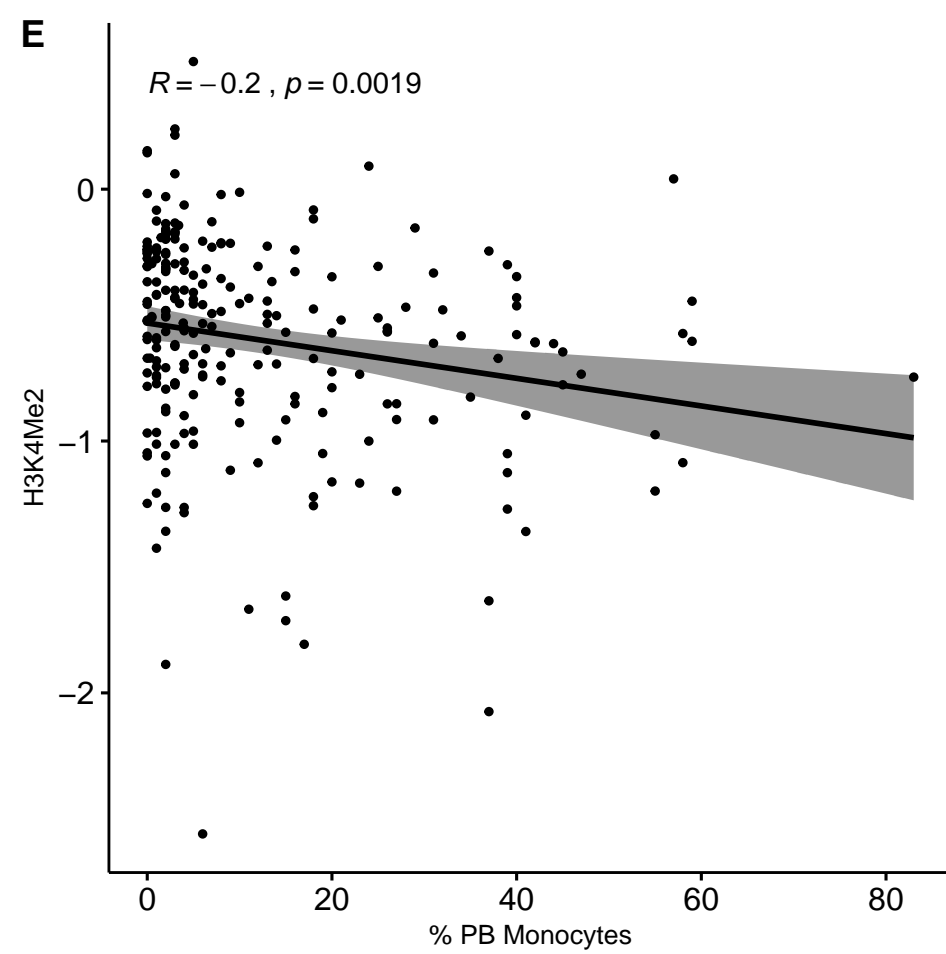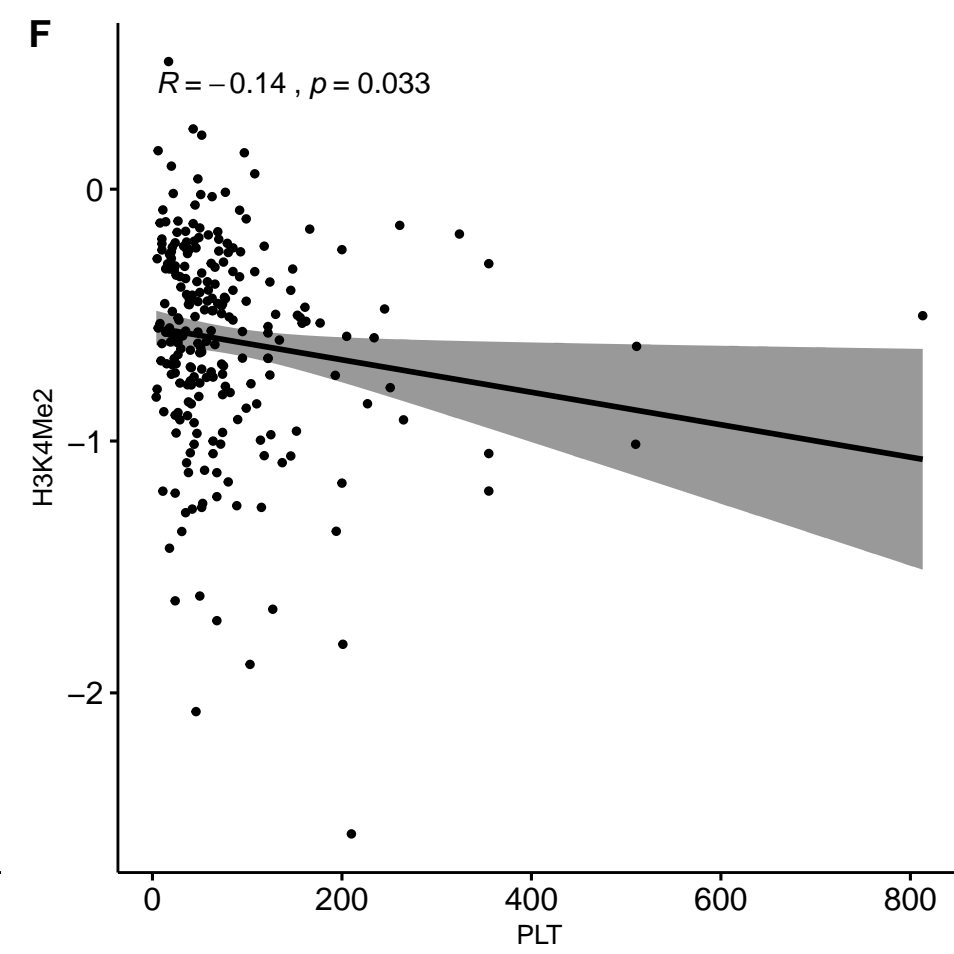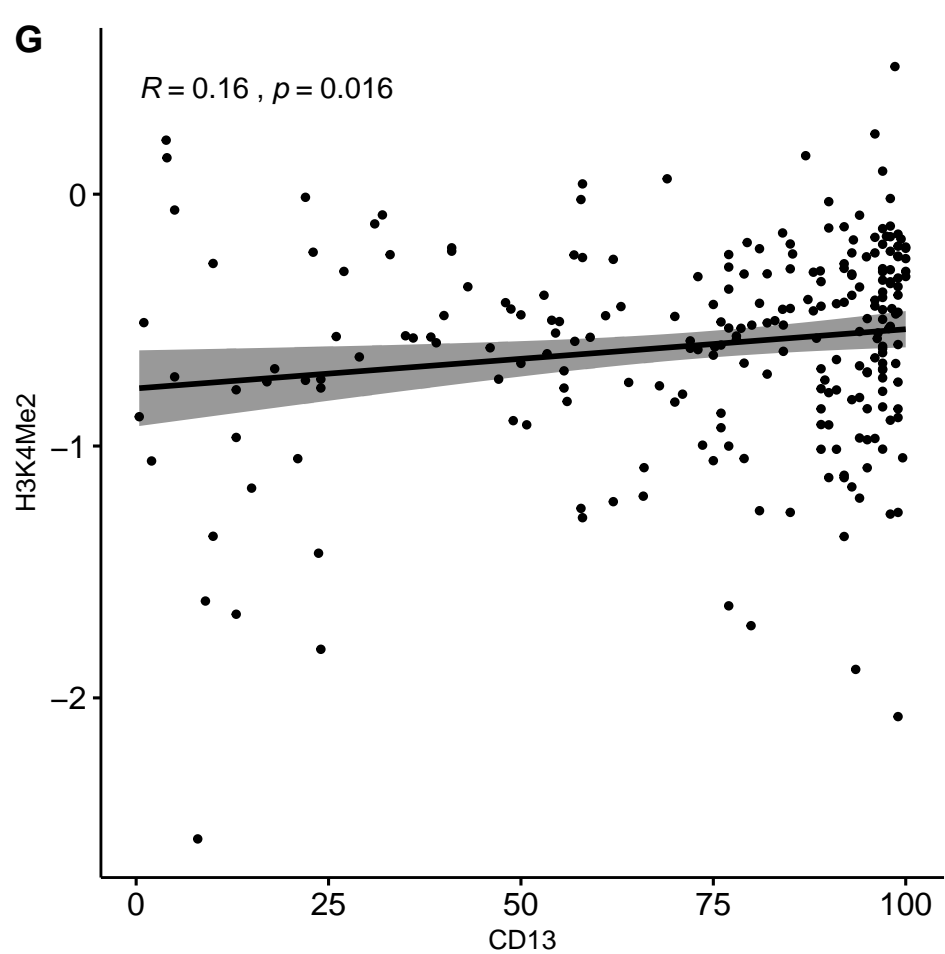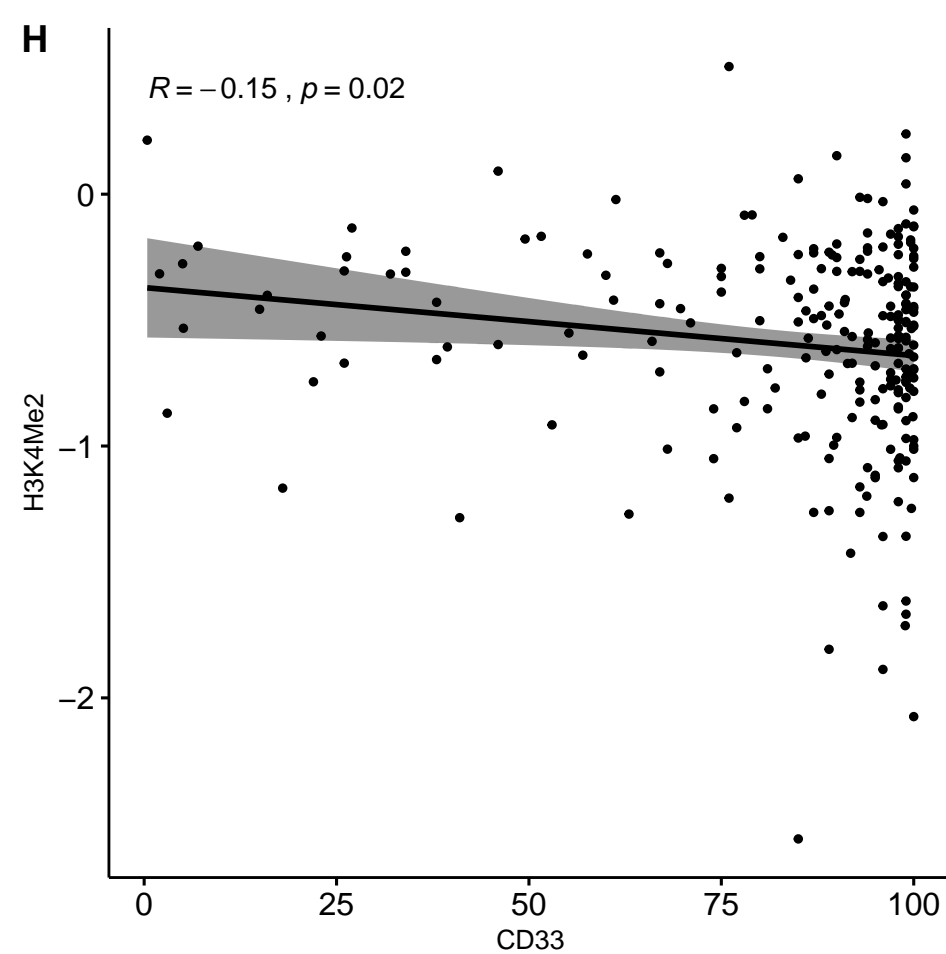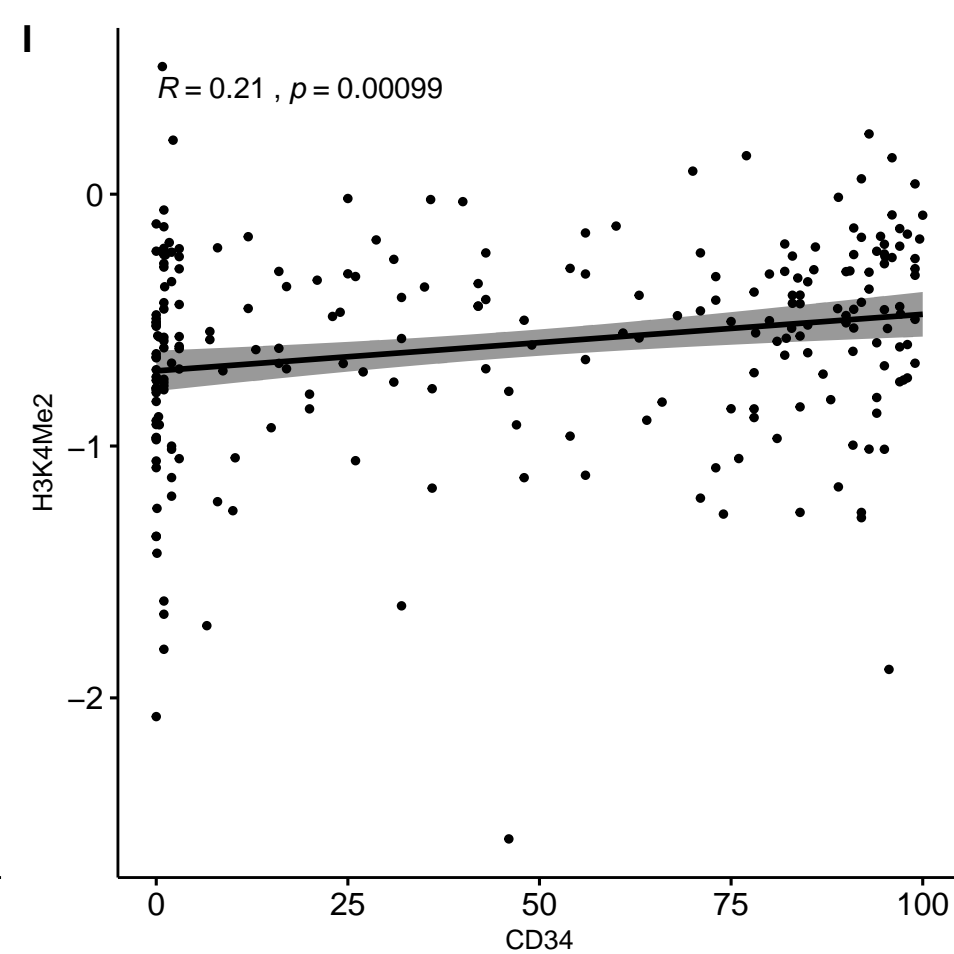

Supplement: 13148_2021_1011_MOESM2_ESM.pdf [file 13148_2021_1011_MOESM2_ESM.pdf]
