# Supplementary material for: Loss of H3K27 methylation identifies poor outcomes in adult-onset acute leukemia
Source: PubMed Central journal article supplement (PMC7841917; doi:10.1186/s13148-021-01011-x), 2021-01-28

**A** Prior Chemotherapy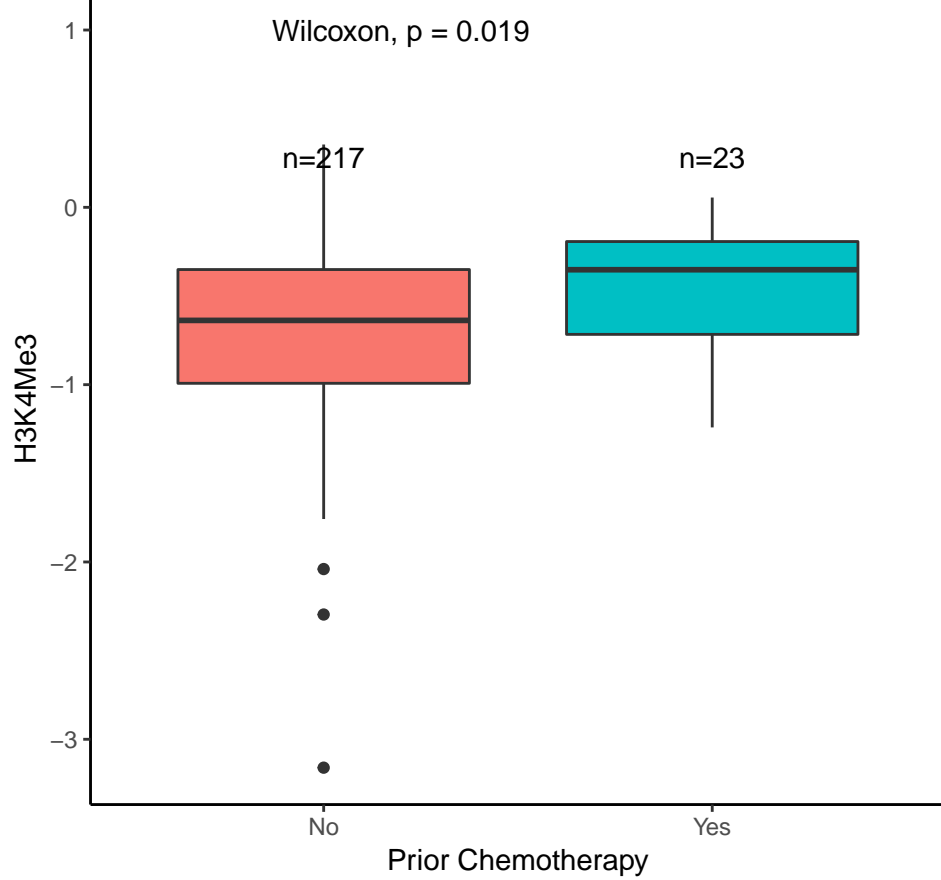**B** Prior radiotherapy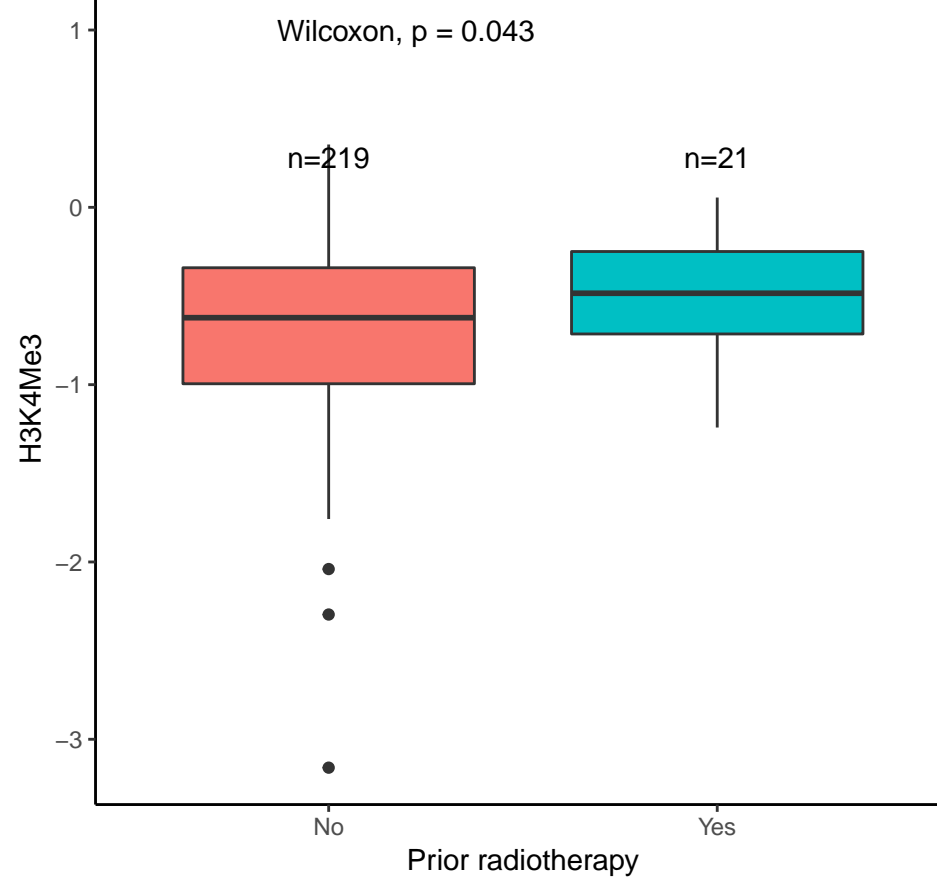**C** FLT3-D835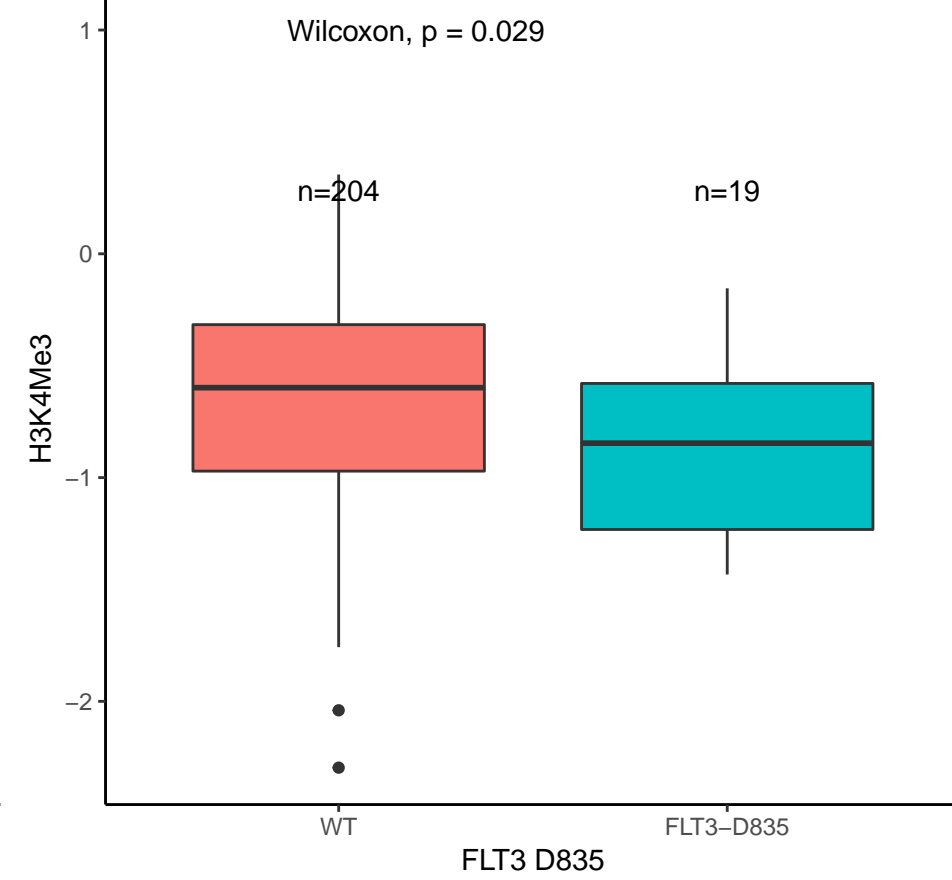**D**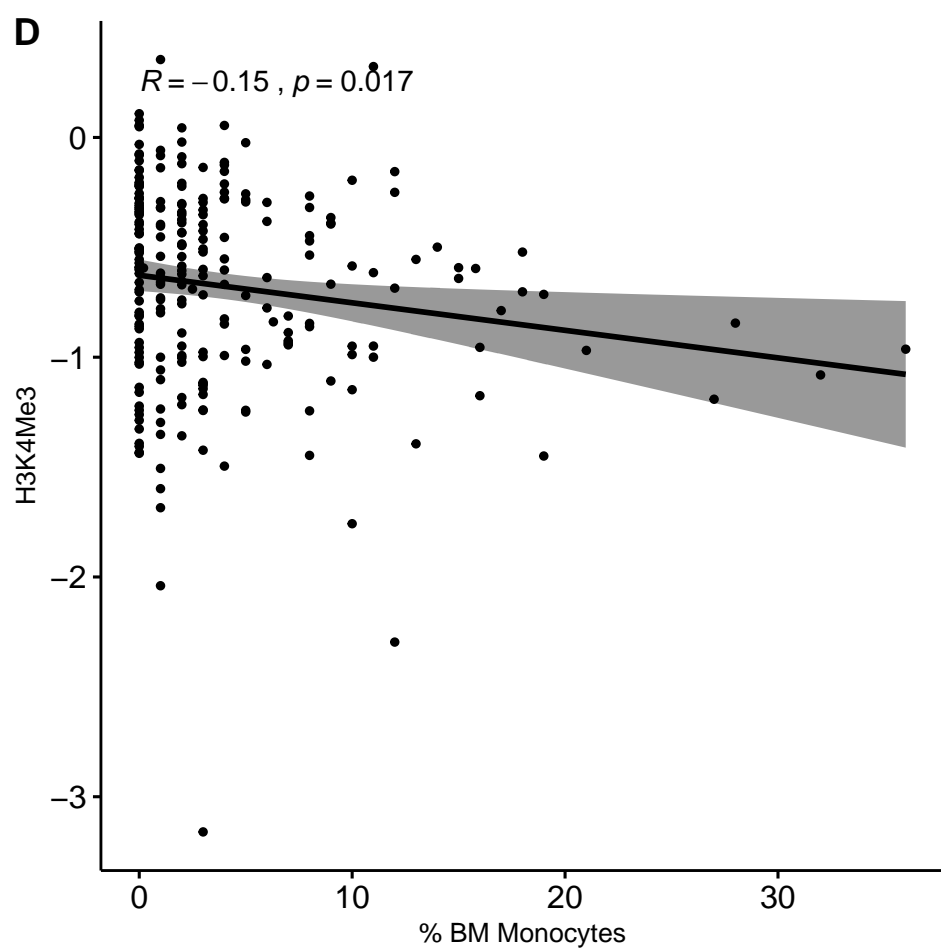**E**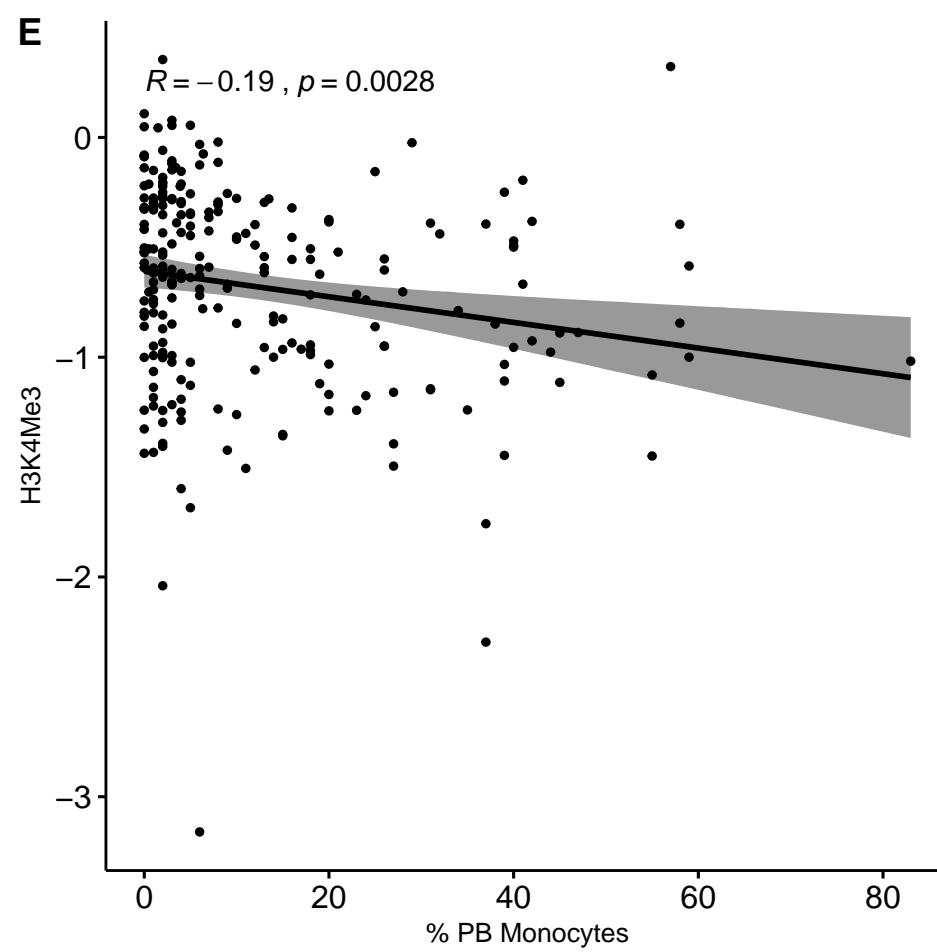**F**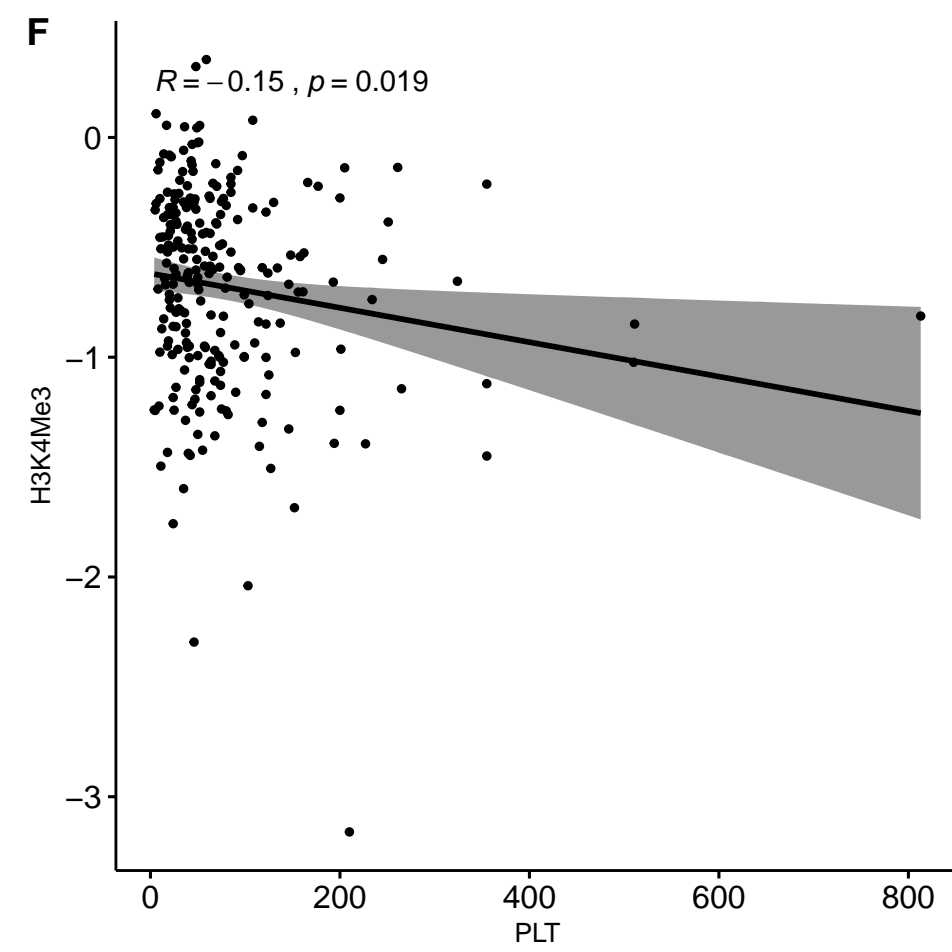**G**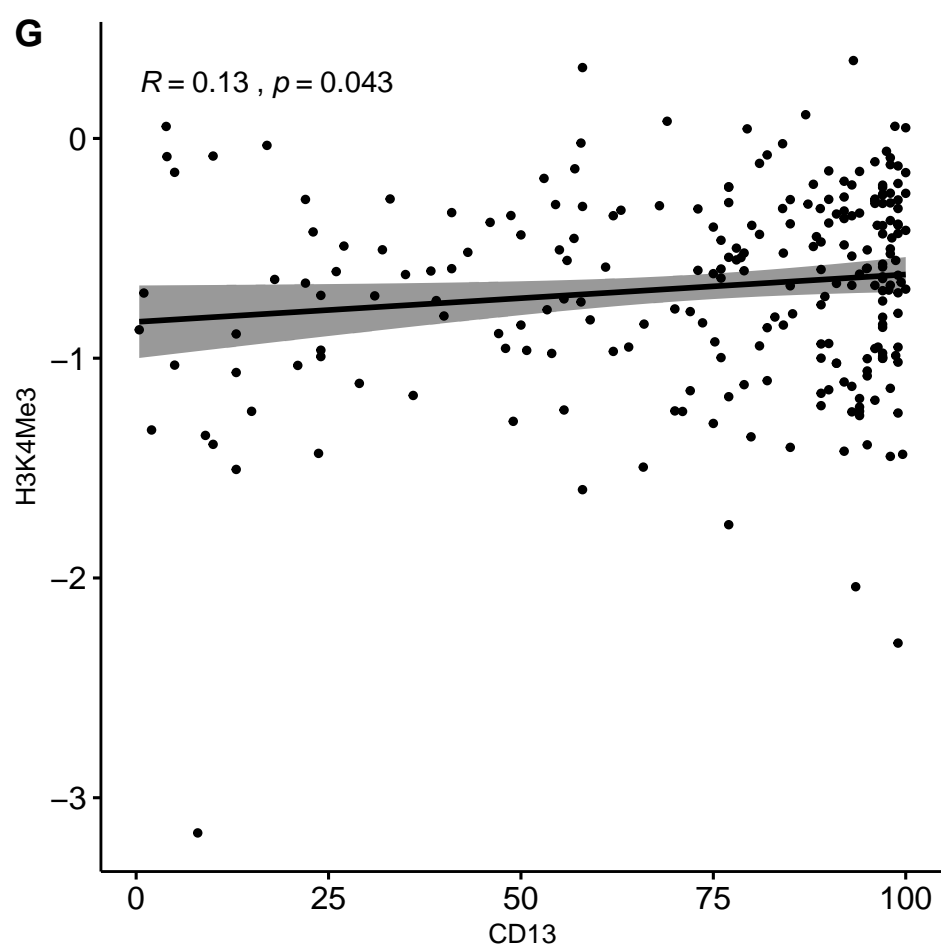**H**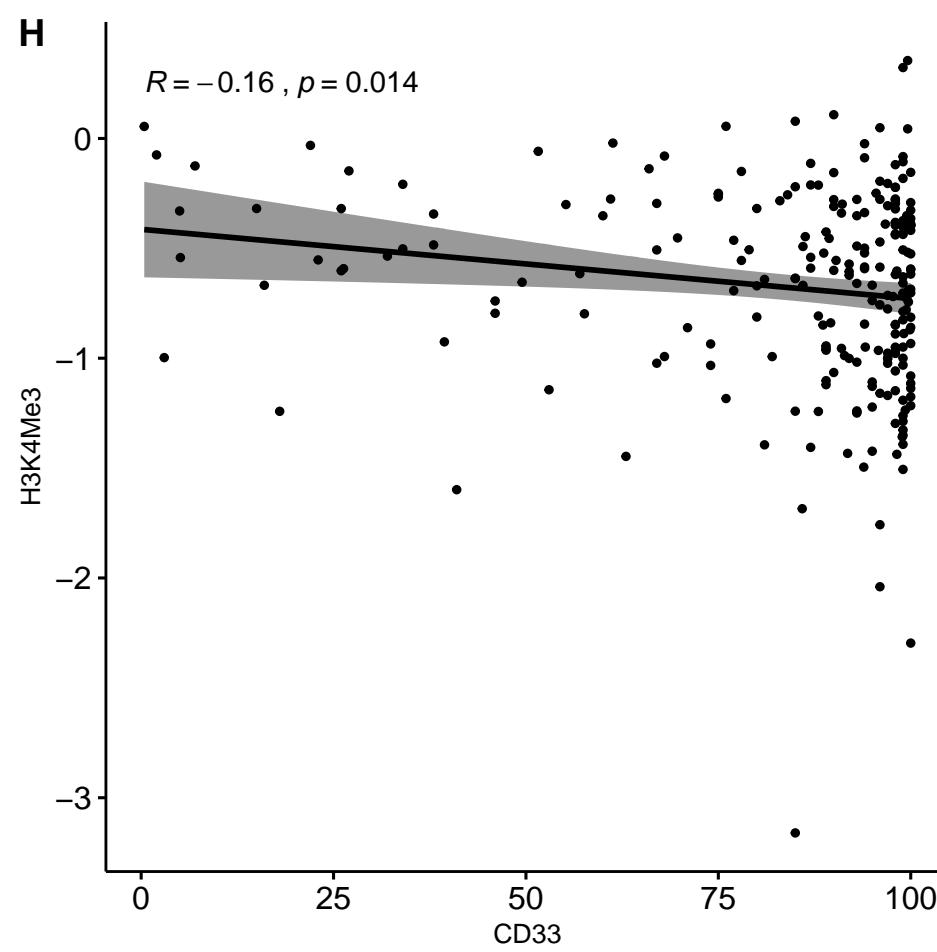**I**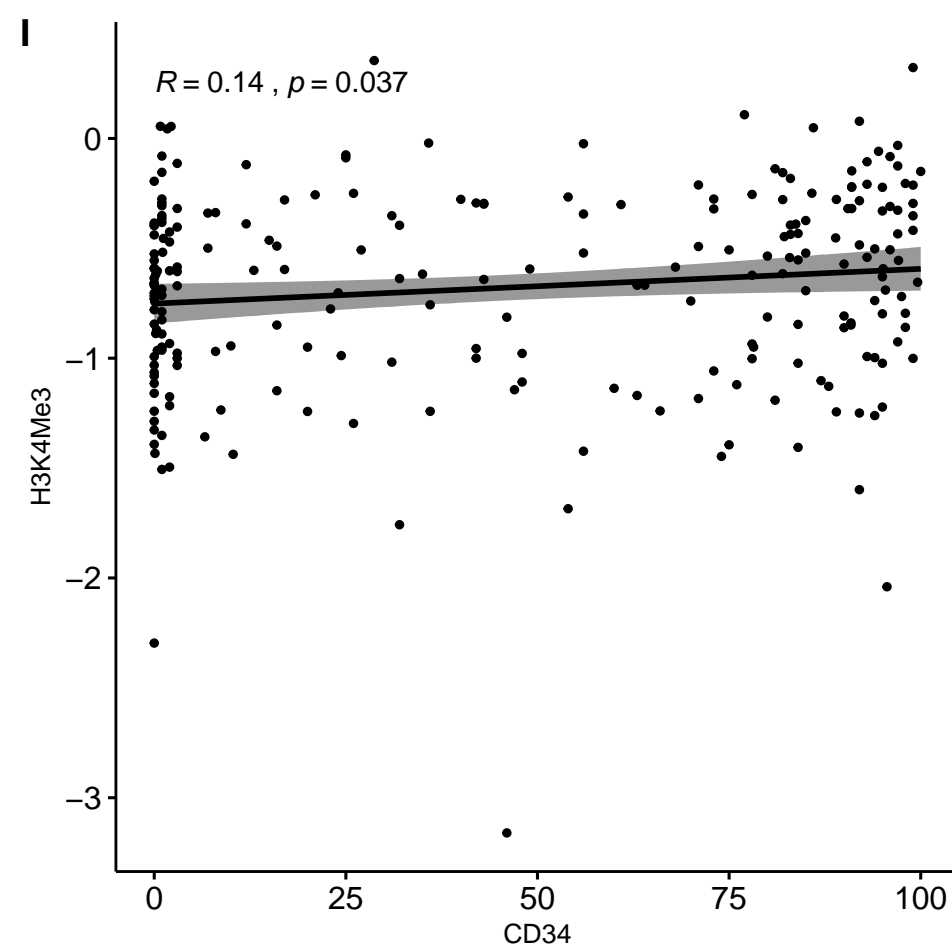

Supplement: 13148_2021_1011_MOESM3_ESM.pdf [file 13148_2021_1011_MOESM3_ESM.pdf]
